# Supplementary material for: Understanding patterns of HIV multi-drug resistance through models of temporal and spatial drug heterogeneity
Source: eLife. 2021 Sep 2;10:e69032. doi: 10.7554/eLife.69032 (PMC8412921; doi:10.7554/eLife.69032)
Supplement: Supplementary file 1. [file elife-69032-supp1.xlsx]

## Sheet: Sheet1
	Study	DOI	Types of therapies examined?	Types of patterns matched?	Includes stochastic model
Temporally-varying drug levels	Wahl and Nowak, 2000	10.1098/rspb.2000.1079	AZT+3TC+RTV	Does not match clinical patterns	Yes
	Dorman et al, 2000	10.1097/00042560-200012150-00003	Generic reverse transcriptase inhibitors/ protease inhibitors	Does not match clinical patterns	No
	Philips et al, 2001	10.1097/00002030-200111230-00001	Generic triple drug therapy	Does not match clinical patterns directly, but discusses resuts in the context of clinical trial data	Yes
	Huang, Rosenkranz, Hu, 2003	10.1016/s0025-5564(03)00058-0	AZT+3TC+RTV	Does not match clinical patterns	Yes
	Smith, 2006	10.1098/rspb.2005.3352	Most discussion centered on specific single drugs, some discusion of combination therapies and their associated therapy "tails"	Matches mutational timing for three patient case studies	Yes
	Braithwaite et al, 2006	10.1093/jac/dkl386	Combination therapies represented by abstract "therapy effectiveness"	Adherence resistance curves, but agnostic to mutational types	Yes
	Rong, Feng & Perelson, 2007	10.1007/s11538-007-9203-3	Single drugs (generic, in that PIs/NNRTIs are parameterized, but nothing more specific)	Does not match clinical patterns	No
	Cadosch, Bonhoeffer & Kouyos, 2012	10.1098/rsif.2012.0127	Generic triple drug therapy (i.e., does not match specific drugs parameters)	Does not match clinical patterns	Yes
	Rosenbloom et al, 2012	10.1038/nm.2892	Focuses on specific parameters of single drugs, examines one double drug therapy	Matches rates of resistance/VR of single drugs, and specific clinical patterns: i.e., outgrowth of certain treated populations without resistance	Yes
	Bershteyn and Eckhoff, 2013	10.1186/1752-0509-7-11	Prep (TDF + FTC)	Timescales of resistance in humans/SHIV studies	Yes
Spatially-varying drug levels	Kepler & Perelson, 1998	10.1073/pnas.95.20.11514	Indivavir monotherapy	Does not match clinical patterns	No
	Moreno-Gamez et al, 2015	10.1073/pnas.1424184112	Double drug therapies (generic)	Qualitative single resistance mutations at a time, overall rates of failure	Yes
	Sanche et al, 2017	10.1002/psp4.12200	EFV monotherapy, DRV monotherapy, EFV+TDF+FTC	Probability of virologic failure at a fixed endpoint	Yes
