# Supplementary material for: Understanding patterns of HIV multi-drug resistance through models of temporal and spatial drug heterogeneity
Source: eLife. 2021 Sep 2;10:e69032. doi: 10.7554/eLife.69032 (PMC8412921; doi:10.7554/eLife.69032)
Supplement: Supplementary file 2. [file elife-69032-supp2.csv]

Year	point.estimate	X95_conf_low	X95_conf_high	treatmentType
1	0.91026156588427	0.89951227932448	0.922176686317235	3TC
2	0.948147159832169	0.937224023427053	0.957558969947704	3TC
3	0.963567789678108	0.953157707483408	0.973410481451432	3TC
4	0.974710468931167	0.965921675860397	0.982020119462426	3TC
5	0.979434623236479	0.971332253691904	0.987074434577434	3TC
6	0.978933413071048	0.970300009578666	0.98613808814911	3TC
7	0.98089348287149	0.971988432365974	0.988934176418264	3TC
8	0.981264909928472	0.973384847137283	0.988469087595397	3TC
9	0.98036459130132	0.970867065016474	0.988637095079926	3TC
10	0.98445462280173	0.973199704130003	0.991954576641558	3TC
1	0.971224818136274	0.964175465062035	0.977708698884135	NRTI
2	0.966509006406839	0.957683633242436	0.974434513037041	NRTI
3	0.980412105828815	0.973988211617783	0.985503336421745	NRTI
4	0.985261914848085	0.978696449819965	0.990487664745038	NRTI
5	0.992197722428508	0.98665132333601	0.995878997655659	NRTI
6	0.987301569649393	0.982023852006661	0.992844759038232	NRTI
7	0.986067045758609	0.978816250656464	0.99193296567442	NRTI
8	0.993435058546861	0.98933122720119	0.997340236973812	NRTI
9	0.987533186781601	0.980387641248929	0.995583701618129	NRTI
10	0.995391480686081	0.989078154255202	1	NRTI
1	0.930395290400246	0.921217576291059	0.94037153263093	NNRTI
2	0.953112757202505	0.943457994314275	0.960846168196698	NNRTI
3	0.964875485598071	0.956471307733124	0.972785099479125	NNRTI
4	0.966108308280506	0.954825219352209	0.975293038631827	NNRTI
5	0.976305191881048	0.968378134977464	0.984531817237878	NNRTI
6	0.972557092362316	0.964307179165281	0.981316429639153	NNRTI
7	0.979385896920086	0.972370298381949	0.98699117072214	NNRTI
8	0.972402540234873	0.95785755509883	0.980936608410543	NNRTI
9	0.98051873797457	0.969619088723549	0.988651814855766	NNRTI
10	0.986084802677443	0.976836216813025	0.993692375867081	NNRTI
1	0.980519435547164	0.974786869105336	0.985922287749773	PI
2	0.981504647974667	0.97444107518814	0.987128879383058	PI
3	0.984222146650312	0.978535570773692	0.989510416960075	PI
4	0.993547286320074	0.987955899408424	0.99680102429506	PI
5	0.993015768520539	0.987010519988889	0.997272255425992	PI
6	0.993038285437994	0.988141813373313	0.996989630778646	PI
7	0.993241978233281	0.988385555565912	0.997457495233897	PI
8	0.994489131999612	0.990556229552814	0.998206580926948	PI
9	0.997950664615229	0.994760522810164	1	PI
10	0.996606912743581	0.991831471506997	1	PI
