# Supplementary material for: Understanding patterns of HIV multi-drug resistance through models of temporal and spatial drug heterogeneity
Source: eLife. 2021 Sep 2;10:e69032. doi: 10.7554/eLife.69032 (PMC8412921; doi:10.7554/eLife.69032)
Supplement: Supplementary file 3. — Variables in table are fit as follows f⁢(t)=α⁢eβ*t. [file elife-69032-supp3.csv]

Treatment	r2	Param	Estimate	Std. Error	t value	Pr(>|t|)
3TC	0.781647222	a	0.049177531	0.159771344	-18.85393445	2.93E-07
3TC	0.781647222	b	-0.122441766	0.024459892	-5.005817974	0.001555058
PI	0.79753265	a	0.024836428	0.274803944	-13.44756471	2.95E-06
PI	0.79753265	b	-0.22091457	0.04207059	-5.251045201	0.001184867
NNRTI	0.816660376	a	0.053476159	0.139935793	-20.92759326	1.43E-07
NNRTI	0.816660376	b	-0.119626129	0.021423206	-5.583950938	0.000829783
NRTI	0.628539622	a	0.0336099	0.326654835	-10.38691073	1.66E-05
NRTI	0.628539622	b	-0.172109101	0.050008604	-3.441589768	0.010813859
