# Supplementary material for: Understanding patterns of HIV multi-drug resistance through models of temporal and spatial drug heterogeneity
Source: eLife. 2021 Sep 2;10:e69032. doi: 10.7554/eLife.69032 (PMC8412921; doi:10.7554/eLife.69032)
Supplement: Supplementary file 4. — See materials and methods section 'Determining the total number of resistance mutations and the first drug resistance mutation on a treatment' for more details. [file elife-69032-supp4.csv]

	ListDrugs	ListMutTargetRate
1	3TC	7.8692e-05
2	FTC	7.8692e-05
3	ABC	0.000112507
4	DDI	0.000111714
5	TDF	3.9015e-05
6	D4T	0.000104651
7	AZT	8.2451e-05
8	EFV	0.00018199
9	ETR	0.000159843
10	NVP	0.00018199
11	RPV	0.000159843
12	NFV	0.000171827
13	ATV	0.000172356
14	DRV	9.4567e-05
15	FPV	0.000185681
16	IDV	0.000173259
17	LPV	0.000186527
18	SQV	0.000100745
19	TPV	0.000148252
