# Supplementary material for: Understanding patterns of HIV multi-drug resistance through models of temporal and spatial drug heterogeneity
Source: eLife. 2021 Sep 2;10:e69032. doi: 10.7554/eLife.69032 (PMC8412921; doi:10.7554/eLife.69032)
Supplement: Supplementary file 5. [file elife-69032-supp5.csv]

Regimen tested	Hypothesis tested	number of successes (i.e., 3TC or FTC resistance is the first DRM)	number of trials (i.e., total number of observations of a single DRM)	Expected probability of success based on mutation rates	One-sided binomial test p-value	rank	Benjamini-Hochberg significance threshold (FDR = 0.05)	Significant
3TC+D4T+LPV	3TC/FTC first	72	75	0.213	1.35E-44	1	0.007142857	TRUE
3TC+AZT+NFV	3TC/FTC first	81	86	0.236	1.66E-44	2	0.014285714	TRUE
3TC+D4T+NFV	3TC/FTC first	40	43	0.222	3.93E-23	3	0.021428571	TRUE
3TC+AZT+IDV	3TC/FTC first	41	50	0.235	4.15E-18	4	0.028571429	TRUE
3TC+D4T+IDV	3TC/FTC first	17	21	0.221	1.64E-08	5	0.035714286	TRUE
3TC+AZT+LPV	3TC/FTC first	12	13	0.226	1.86E-07	6	0.042857143	TRUE
3TC+AZT+SQV	3TC/FTC first	11	11	0.3	1.80E-06	7	0.05	TRUE
