# Supplementary material for: Understanding patterns of HIV multi-drug resistance through models of temporal and spatial drug heterogeneity
Source: eLife. 2021 Sep 2;10:e69032. doi: 10.7554/eLife.69032 (PMC8412921; doi:10.7554/eLife.69032)
Supplement: Supplementary file 6. [file elife-69032-supp6.csv]

Regimen tested	Hypothesis tested	number of successes (i.e., NNRTI resistance is the first DRM)	number of trials (i.e., total number of observations of a single DRM)	Expected probability of success based on mutation rates	One-sided binomial test p-value	rank	Benjamini-Hochberg significance threshold (FDR = 0.05)	Significant
3TC+D4T+EFV	NNRTI first	100	132	0.498	9.40E-10	1	0.007142857	TRUE
EFV+FTC+TDF	NNRTI first	37	37	0.607	9.65E-09	2	0.014285714	TRUE
3TC+D4T+NVP	NNRTI first	81	106	0.498	1.81E-08	3	0.021428571	TRUE
3TC+AZT+EFV	NNRTI first	93	122	0.53	1.08E-07	4	0.028571429	TRUE
3TC+ABC+EFV	NNRTI first	14	16	0.488	0.00154	5	0.035714286	TRUE
3TC+AZT+NVP	NNRTI first	37	52	0.53	0.00594	6	0.042857143	TRUE
3TC+EFV+TDF	NNRTI first	10	15	0.607	0.426	7	0.05	FALSE
