# Supplementary material for: Understanding patterns of HIV multi-drug resistance through models of temporal and spatial drug heterogeneity
Source: eLife. 2021 Sep 2;10:e69032. doi: 10.7554/eLife.69032 (PMC8412921; doi:10.7554/eLife.69032)
Supplement: Supplementary file 7. [file elife-69032-supp7.xlsx]

## Sheet: Sheet1
	Attributes of drug								Attributes of resistance mutation
Drug	Class	IC50	Slope	Cmax	Half-life	Number_of_daily_doses	Average drug concentration (ϵ)	CNS penetrance (p)	s (fitness cost)	mu (mutation rate)	rho	sigma
3TC	NRTI	0.0298	1.15	15.3	10	2	10.39	0.092	0.41	1.1 * 10^-5	963	-0.58
D4T	NRTI	0.5524	1.13	2.3	3.5	2	0.88	0.058	0.17	1.3 * 10^-6	1.08	-0.12
NFV	PI	0.236	1.88	5.1	4	3	2.76	0.00085	0.27	5.5 * 10^-5	2.3	-0.29
